## **A mixed methods study exploring food insecurity and diet quality in households accessing food clubs in England**

Nida Ziauddeen<sup>1,2\*</sup>, Elizabeth Taylor<sup>2,3\*</sup>, Nisreen A Alwan<sup>1,2,4</sup>, Fran Richards<sup>5</sup>, Barrie Margetts<sup>6</sup>, Tim Lloyd<sup>7</sup>, Marta Disegna<sup>8</sup>, Naomi Mason<sup>9</sup>, Ravita Taheem<sup>10,11</sup>, Dianna Smith<sup>2,3</sup>

<sup>1</sup>School of Primary Care, Population Sciences and Medical Education, Faculty of Medicine, University of Southampton, Southampton, UK

<sup>2</sup>NIHR Applied Research Collaboration Wessex, Southampton, UK

<sup>3</sup>School of Geography and Environmental Science, University of Southampton, Southampton, UK

<sup>4</sup>University Hospital Southampton NHS Foundation Trust, Southampton, UK

<sup>5</sup>PPI contributor

<sup>6</sup>Faculty of Medicine, University of Southampton, Southampton, UK

<sup>7</sup>Bournemouth University Business School, Bournemouth, UK

<sup>8</sup>Dipartimento di Tecnica e Gestione dei Sistemi Industriali, Università degli Studi di Padova, Italy

<sup>9</sup>Public Health Dorset, Dorset, UK

<sup>10</sup>Southampton City Council, Civic Centre, Southampton, UK

<sup>11</sup>NIHR Southampton Biomedical Research Centre, University of Southampton and University Hospital Southampton NHS Foundation Trust, Southampton, UK

\*These authors contributed equally to this work.

Corresponding author: Dianna Smith, School of Geography and Environmental Science, University of Southampton, Southampton, UK

D.M.Smith@soton.ac.uk

## Abstract

**Background:** Food clubs are a higher-agency food aid intervention that charge a small fee for a set number of items. Some incorporate longer-term solutions such as budgeting support and cooking skills. These are in place in England to help address inadequate reliable access to affordable, nutritious food. We used a convergent parallel mixed methods design to describe the food insecurity households accessing food clubs experience and to assess diet quality and wellbeing at the start and after at least three months of using food clubs in the South of England.

**Methods:** Participants accessing food clubs in Wessex from March 31 to November 3, 2022 were recruited after providing informed consent. They completed a survey at recruitment that collected data on diet and health. Food security was assessed using the modified six-item US Department of Agriculture (USDA) food security survey module, and wellbeing using the short form Warwick-Edinburgh Mental Wellbeing Scale (WEMWBS). Follow-up surveys were conducted after participants used the clubs for at least three months. Participants were invited to take part in a semi-structured interview.

**Results:** Of the 90 participants recruited at baseline, 52% were aged 35–54 years, 74% were female, 81% were of White ethnicity, and 71% reported having at least one dependent child. Food security status was calculated in 69 participants who answered all six questions of the USDA module, with 42% reporting low and 43% very low food security. Among participants with follow-up (n=52), low food security was 41% and very low food security was 18% at follow-up.

Eleven participants were interviewed. Two themes explored impact and experiences of food club. Impact illustrated how participants consumed a more varied diet, experienced less financial pressure, and improved health, wellbeing and social interaction. Experiences of food clubs explored limitations of time and food range at clubs, developing a sense of community and overcoming stigma.

**Conclusion:** This study is the first in the UK to explore potential diet, food security and wellbeing impacts of food clubs. Ongoing impact evaluation will enable optimisation of interventions for the populations they serve, such as inviting other organisations/groups to attend/be available for members.

**Keywords:** food insecurity, diet quality, wellbeing, food aid

## Introduction

Household food insecurity is a longstanding social inequality in many high-income countries (1). Sometimes referred to as food poverty in the UK, the term describes households that experience nutritionally inadequate diets in the form of reduced portions, poorer diet quality, or skipped meals most often due to financial pressures (2,3). These elements of food insecurity are reflected in standard questions asked in surveys which capture this phenomenon, such as the US Department of Agriculture's (USDA's) measure (4). The UK government applied a brief definition of household food security where households are '...considered to have sufficient, varied food to facilitate an active and healthy lifestyle' in a 2024 report, noting that 10% of UK households were food insecure (5). Extended definitions of food security account accessing food without accessing charity and note the challenge of uncertainty of having enough food (6).

Food insecurity has gained increasing attention over the last few decades in the UK (7). Historically, systematic data collection on the incidence of food insecurity in UK households was minimal, with this lack of evidence masking the scale of the problem. More recently, regular surveys of households have helped to fill the evidence gap (e.g. the biannual Food and You 2 survey, the annual Family Resource Survey and a quarterly survey commissioned by the Food Foundation). These data enable researchers and governments in the UK to identify the prevalence and dynamics of household food insecurity over time, highlighting the demographic characteristics of affected households.

In light of the emerging evidence on food insecurity, the primary policy response has been to provide additional funds via welfare benefits and other means of support, particularly for households with children, such as Free School Meals, the Household Support Fund and the Holiday activities and food programmes. However, the income threshold for these government interventions is very low<sup>1</sup> leaving many households requiring additional or alternative forms of assistance. Emergency intervention typically takes the form of food banks, where free parcels of food are given to a person or household referred by another organisation, school, or General Practitioner. Usually there is little choice in terms of the food provided in these parcels as they are predominantly made up from donated or surplus food from suppliers including supermarkets or larger organisations that collate and redistribute surplus food (FareShare in the UK). Initially, food banks provided only ambient (tinned, dry) foods but many more now have some refrigeration capacity and offer chilled foods, alongside fresh or frozen produce. Many groups are calling for a cash-first response to food insecurity, to provide national funds to people and allow them to buy what is needed (8). One example of this was the £20 per week uplift in Universal Credit payments during the Covid-19 pandemic. This payment may have supported a reduction in the prevalence of food insecurity during this time (5).

There are known barriers to accessing food banks such as the stigma of accepting help, or where children are involved, a perceived fear among parents that intervention may risk their children being taken into care/social services (9–11). Alternatives to referral-only food banks include food pantries/clubs, where people pay a small fee each week to choose from a range of heavily discounted food or household items; community fridges, where anyone can come and collect free food; or box schemes, where for a small/no fee households receive a parcel of food, perhaps around a recipe, although there is typically no choice in the food available. Among these alternatives, the food pantry or club represents a higher-agency food aid intervention, where people are given greater autonomy over the food they receive unlike in

---

<sup>1</sup>In receipt of Universal credit with household income less than £7400/year or other benefits.

traditional food banks. This type of intervention is often referred to as a choice model, since it allows clients to choose food rather than receive a pre-packed parcel (12–15). Despite the growing popularity of this model of food intervention, their potential impacts in terms of improving food security, diet quality and wellbeing are yet to be studied in the UK. Overall, there is growing awareness that food aid is forming a larger part of the food environment for some households, meaning that it is part of the resources available influencing what people consume (5,16,17).

Food insecurity is a public health issue, with negative impacts on physical and mental health (18). The food consumed in less food secure households is often of lower nutritional quality (2,3) as less processed foods (especially fresh produce, meat, dairy) are more expensive (19). Parents reducing their portion size or skipping meals to ensure their children have more food is a common occurrence in such households (20–22) and gives rise to the co-occurrence of obesity and malnutrition (23,24). The historic aim of food aid interventions of any type is to provide food first, with the nutritional quality of the food a secondary consideration that may not support the specific needs of recipients in terms of diet and health (16,25,26). Given that much of the food is donated by the public, obtained through surplus food redistribution, or purchased by the providers, there is no guarantee that food from these sources will support a 'healthy' diet such as that recommended by the UK government. A recent systematic review demonstrates that the nutritional quality of food bank parcels is relatively poor, failing to meet nutritional requirements or cultural and health preferences (26).

Mental health can be negatively impacted by food insecurity and seeking food aid. Systematic reviews demonstrate that depression is strongly associated with food insecurity for parents (27), and for all adults food insecurity is a risk factor for stress or depression (18). Food insecurity is also shown to be associated with anxiety and depression during the Covid-19 pandemic (28). Qualitative studies suggest that worrying about food quality or having enough to eat as well as feeding children are some reasons this relationship between food insecurity and mental health is observed (29,30).

This paper reports the results from a mixed methods study in Wessex, South of England, which aimed to explore food insecurity, diet quality and mental wellbeing in participants using higher-agency food clubs. Pre and post intervention surveys are used to collect data along with semi-structured interviews with clients during 2022, the year in which the UK's cost of living crisis was at its peak.

## **Methods**

### *Food club settings*

Two membership food clubs in Wessex were involved in this project. Both membership clubs offered a range of products including fresh fruit and vegetables; snacks (cakes, chocolate, biscuits); canned food, food cupboard staples (cereals, pasta, bread, rice); and household and personal hygiene items. The items were categorised into four or five groups and members selected a pre-specified number of items from each group. The groups were set by the clubs so could be different across the clubs but both clubs had a fruits and vegetables group in common. All members get the same quantity of food regardless of household size. Members at both clubs could additionally help themselves to "free food" items when available, which are foods that did not count towards their item limit but tended to be items available in surplus that could not be stored by the clubs, such as bread. Club A was associated with a food bank and had refrigeration facilities so offered meat, dairy products and frozen items including fruit and vegetables.

Club A was restricted to members from a specific geographic area and operated once a week for three hours at one of three locations. Club B allowed members to access any location multiple times a week, operating two different sites for two hours a week at each site. The opportunity to access at different locations meant that it was more accommodating to user's schedules who could choose the alternate location or day if that suited them better. Both clubs offered hot drinks, social networking opportunities, and signposting to additional support/wraparound services. Club A also provided pastries from local outlets, invited representatives from various support organizations and at some sites, a "pay what you can" hot food option. During the study, two of Club A's sites opened, while Club B experienced site changes (one closure), typical in food aid services.

In both clubs, members paid a fee to select items of food which were sourced mainly from FareShare (national network of surplus food redistribution to charities in the UK for use to support people in their communities; please see <https://fareshare.org.uk/>), other surplus donations or purchased from local supermarkets. At the start of the sample period most food originated from FareShare and surplus donations from local supermarkets, but as the cost-of-living crisis developed the volume of food purchased by the food clubs themselves increased and became the most common source of supply.

#### *Data collection*

Participants aged 18 and over were recruited from the food clubs between March 31 and November 3, 2022. Members of the research team visited the sites, asked users to complete a brief survey, and invited them for an interview. Observations at the food clubs were recorded by the research team, including interactions between volunteers and service users and the way spaces were used in the clubs. Written informed consent was obtained.

*Surveys:* Participants completed a baseline survey at recruitment that collected data on diet, food practices, demographics, and health. Baseline data were collected retrospectively for participants at intervention sites that were already in place when the study commenced (one site each for club A and B) if participants had been service users for at least three months. These existing service users had used the interventions for less than 12 months at time of recruitment. New site users for the clubs which opened during the time of our study needed time to settle in prior to engaging in the study and were usually recruited at the second or third visit, two or three weeks after their initial visit to complete a baseline survey and then we followed up after three months from the date of their first survey.

Survey respondents who were already service users for at least three months completed the baseline and follow up surveys concurrently. We asked them to reflect on the time before they accessed the service and to answer the questions for this time period prior to using the food club for the baseline survey. Follow-up surveys included the same questions as the baseline survey (without demographics) and were completed after attending the clubs for at least three months. We discussed with our steering group and public representatives the implications of asking service users to complete a baseline survey retrospectively, where they had already been using the food club. There was agreement that for the questions asked in the survey, service users would have strong memories of their diet practices prior to using the service. Previous research has demonstrated that diet recall was reliable in retrospective surveys (31–34). However, we will focus on descriptive analysis.

We used the modified six-item USDA food security survey module (4) to ask about food security in the last 30 days and the short form Warwick-Edinburgh Mental Wellbeing Scale (WEMWBS) (35) to capture a measure of mental wellbeing. Food insecurity was calculated both using the USDA guidance and following the approach used by the Food Foundation in the UK (using responses to three of the six USDA module questions to capture moderate

and severe experiences of food insecurity (36)). Diet quality was assessed using a food frequency questionnaire (FFQ) and the associated diet quality score, composed of fruit, vegetable, oily fish, fat and non-milk extrinsic sugar intakes, was calculated (37). The diet quality score ranged from 5 to 15 with higher scores indicating better diet quality. A question on the number of portions of fruit and vegetables consumed in a day was included, as well as the main cooking methods and barriers to a healthy diet. Participants received a £5 supermarket voucher as a thank you gesture for every survey completed.

Baseline and follow-up surveys were either completed on paper and subsequently entered into Qualtrics software by the research team or were completed by participants directly online using Qualtrics on personal devices (a QR code on advertising posters at club sites for baseline and email link for follow-up were provided).

*Interviews:* Participants who completed a baseline survey were invited to participate in a semi-structured interview on Microsoft Teams. Interviews explored pandemic experiences, their views on the food membership clubs and household eating habits. An interview guide was used for consistency and all interviews were conducted by NZ. Interviews lasted between 30 to 60 minutes and were recorded and transcribed using MS Teams transcription software. Transcripts were checked for accuracy against the recording and edited as appropriate to correct inaccuracies by NZ. Participants received a £20 supermarket voucher as a thank you gesture for their time.

#### *Data analysis*

Statistical analysis was undertaken using Stata 17 (38). Descriptive percentages and summary statistics were generated for the full sample and for follow-up data.

Qualitative data was analysed using thematic analysis (39,40). Data analysis followed Braun and Clarke's six-phase approach starting with familiarisation (reading and re-reading transcripts to note items of interest). Initial codes were generated by NZ with second coding of a sample of two interviews by DS using the codebook developed. No additional codes were identified on second coding. Based on the codes, themes were generated by reviewing the coded data to identify areas of similarity. Potential themes were reviewed in relation to the coded data and the entire dataset to ensure themes link to the coded data set. Themes were then defined and named; and finally the narrative of the data based on the analysis was constructed to produce the results summary.

#### *Stakeholder and Patient and Public Involvement (PPI)*

A PPI contributor (FR) was involved in the design of the study, included as a co-applicant on the research funding proposal and consulted throughout the course of this study. The PPI contributor sat on the project steering group and contributed to the direction of the overall project, including development of the survey and interview topic guide, and data collection practices.

The steering group included stakeholders from local authorities and the food aid organisations. The survey was co-developed with steering group members to ensure data collected would be useful to inform decisions about the delivery of higher-agency food aid interventions. This included understanding barriers to household food security in this time- and resource-poor population, and contributed to questions in the interview guide. Surveys and interview guides used in data collection will be available as a toolkit for local authorities and food aid providers to use in their own evaluations. In April 2024, we returned to the food clubs to share the outcomes of this research with participants of the study and other food club members.

## **Results**



A total of 90 participants were recruited to the study; 56 from Club A and 34 from Club B. 52 participants completed the baseline and follow-up surveys. 38 out of the 52 participants with follow-up completed baseline and follow-up surveys at the same time as they had been attending the food club for at least three months at the time of recruitment. We will refer to these participants as the concurrent follow-up group hereafter.

75 participants were invited to interview as they included their contact information on the initial survey. Invitations were prioritised to reflect a distribution across the interventions and for households with children. In total 11 participants (21% of sample with follow-up) were interviewed. One interviewee attended both food clubs.

### **Survey results**

Characteristics of participants are shown in Table 1. 52% of participants at baseline were aged 35–54 years (n=43), 74% were female (n=63), 81% were of White ethnicity (n=73) and 71% reported having one or more dependent children (n=59).

#### *Food security*

At baseline (recruitment), 58.5% of participants (n=51) reported skipping or cutting size of meals because there was not enough money for food (Supplementary Table 1). Among participants with follow-up data, 58% (n= 29) reported skipping or cutting size of meals at baseline (Figure 1). At follow-up, 69% (n=9) without concurrent follow-up and 15% (n=5) with concurrent follow-up reported skipping or cutting size of meals.

Food security status at baseline was calculated for 69 participants who answered all questions of the USDA module, with 42% (n=29) reporting low food security and 43% (n=30) reporting very low food security.

Among participants with follow-up data, very low food security was 33% (n=13) at baseline, 33% (n=3) with non-concurrent follow-up and 13% (n=3) with concurrent follow-up. Low food security was 56% (n=22) at baseline, 55% (n=5) with non-concurrent follow-up and 37% (n=11) with concurrent follow-up. High or marginal food security was 10% (n=4) at baseline, 11% (n =1) with non-concurrent follow-up and 50% (n=15) with concurrent follow-up. Thirteen participants with follow-up data did not answer all six questions of the USDA food insecurity measure and thus we were unable to categorise their food insecurity status.

Using the Food Foundation approach, food insecurity was 68.4% (n=26) at baseline and 29.7% (n=11) at follow-up in participants with concurrent follow-up, and 85.7% (n=12) at baseline and 69.2% (n=9) at follow-up in participants who completed the surveys three months apart (non-concurrent follow-up).

#### *Diet quality*

A third (32%, n=29) of 90 participants at baseline reported rarely or never eating fruit, with 23% (n=21) eating fruit at least once a day (Supplementary Table 2). For the sample with follow-up, 29% (n=15) at baseline, 36% (n=5) with non-concurrent follow-up and 5% (n=2) with concurrent follow-up reported rarely/never eating fruit at follow-up (Supplementary Tables 3 and 4). Similarly, 12% (n=6) at baseline, none with non-concurrent follow-up and 3% (n=1) with concurrent follow-up reported never eating vegetables. 23% (n=12) at baseline, 62% (n=8) with non-concurrent follow-up and 29% (n=11) had vegetables 2-3 times/week.

The proportion of participants with diet quality scores of 11 or more (better quality diet) was 32.7% (n=17) at baseline and 48.1% (n=6) at follow-up. In participants without concurrent follow-up, diet quality increased in 35.7% (median change 2, IQR 1 to 2), decreased in 28.6% (median change -1, IQR -1.5 to -1) and no change in 35.7% of participants. In participants with concurrent follow-up, diet quality increased in 47.4% (median change 1,

IQR 1 to 2), decreased in 31.6% (median change -1, IQR -2 to -1) and no change in 21.1% of participants.

### *Mental health*

Based on scoring of responses to the WEMWBS questions, low wellbeing was 54.1% (n=20) at baseline and 29.7% (n=11) at follow-up in those with concurrent follow-up. Mental wellbeing increased in 50% of the sample (mean change 2.1 points, SD 1.2), decreased in 21.4% (mean change -6.4 points, SD 1.1) and no change in 28.6% of the sample without concurrent follow-up.

### *Food practices*

69.2% (n=36) participants reported feeling confident cooking at baseline and 86% (n=43) at follow-up). 10.1% (n=5) reported trying new foods or recipes more frequently at baseline, and 24.5% (n=12) at follow-up.

Table 1: Characteristics of participants recruited from the food membership clubs

|                                                                           | Baseline |      | Follow-up |      | Non-concurrent follow-up (at 3 months) |       | Concurrent follow-up |      |
|---------------------------------------------------------------------------|----------|------|-----------|------|----------------------------------------|-------|----------------------|------|
|                                                                           | n        | %    | n         | %    | n                                      | %     | n                    | %    |
| Total n                                                                   | 90       |      | 52        |      | 14                                     |       | 38                   |      |
| Age, categorised                                                          |          |      |           |      |                                        |       |                      |      |
| 18-24                                                                     | 4        | 4.8  | 2         | 4.4  | 0                                      | 0.0   | 2                    | 6.3  |
| 25-34                                                                     | 14       | 16.9 | 6         | 13.3 | 3                                      | 23.1  | 3                    | 9.4  |
| 35-44                                                                     | 26       | 31.3 | 16        | 35.6 | 5                                      | 38.5  | 11                   | 34.4 |
| 45-54                                                                     | 17       | 20.5 | 10        | 22.2 | 4                                      | 30.8  | 6                    | 18.8 |
| 55-64                                                                     | 13       | 15.7 | 6         | 13.3 | 0                                      | 0.0   | 6                    | 18.8 |
| 65+                                                                       | 9        | 10.8 | 5         | 11.1 | 1                                      | 7.7   | 4                    | 12.5 |
| Prefer not to say/no response                                             | 7        | -    | 7         | -    | 1                                      | -     | 6                    | -    |
| Gender                                                                    |          |      |           |      |                                        |       |                      |      |
| Female                                                                    | 63       | 74.1 | 31        | 66.0 | 12                                     | 85.7  | 19                   | 57.6 |
| Male                                                                      | 22       | 25.9 | 16        | 34.0 | 2                                      | 14.3  | 14                   | 42.4 |
| Prefer not to say/no response                                             | 5        | -    | 5         | -    | -                                      | -     | 5                    | -    |
| Ethnicity                                                                 |          |      |           |      |                                        |       |                      |      |
| White                                                                     | 73       | 81.1 | 39        | 75.0 | 14                                     | 100.0 | 25                   | 65.8 |
| Asian                                                                     | 10       | 11.1 | 8         | 15.4 | 0                                      | 0.0   | 8                    | 21.1 |
| Mixed                                                                     | 3        | 3.3  | 2         | 3.8  | 0                                      | 0.0   | 2                    | 5.3  |
| Black                                                                     | 3        | 3.3  | 3         | 5.8  | 0                                      | 0.0   | 3                    | 7.9  |
| Other                                                                     | 1        | 1.1  | 0         | 0.0  | 0                                      | 0.0   | 0                    | 0.0  |
| Employment status                                                         |          |      |           |      |                                        |       |                      |      |
| Employed full-time                                                        | 10       | 11.8 | 5         | 10.2 | 3                                      | 21.4  | 5                    | 14.3 |
| Employed part-time                                                        | 17       | 20.0 | 9         | 18.4 | 0                                      | 0.0   | 6                    | 17.1 |
| Unemployed                                                                | 45       | 52.9 | 27        | 55.1 | 6                                      | 42.9  | 21                   | 60.0 |
| Self-employed                                                             | 4        | 4.7  | 4         | 8.2  | 3                                      | 21.4  | 1                    | 2.9  |
| Retired                                                                   | 4        | 4.7  | 2         | 4.1  | 1                                      | 7.1   | 1                    | 2.9  |
| Student/trainee                                                           | 2        | 2.4  | 2         | 4.1  | 1                                      | 7.1   | 1                    | 2.9  |
| Carer                                                                     | 3        | 3.5  | 0         | 0.0  | 0                                      | 0.0   | 0                    | 0.0  |
| Prefer not to say/no response                                             | 5        | -    | 3         | -    | -                                      | -     | 3                    | -    |
| Household size                                                            |          |      |           |      |                                        |       |                      |      |
| 1                                                                         | 19       | 21.1 | 11        | 21.2 | 0                                      | 0.0   | 11                   | 28.9 |
| 2                                                                         | 16       | 17.8 | 13        | 25.0 | 2                                      | 14.3  | 11                   | 28.9 |
| 3                                                                         | 16       | 17.8 | 11        | 21.2 | 4                                      | 28.6  | 7                    | 18.4 |
| 4                                                                         | 17       | 18.9 | 8         | 15.4 | 4                                      | 28.6  | 4                    | 10.5 |
| 5 or more                                                                 | 22       | 24.4 | 9         | 17.3 | 4                                      | 28.6  | 5                    | 13.2 |
| Dependent children in household                                           |          |      |           |      |                                        |       |                      |      |
| 0                                                                         | 24       | 28.9 | 14        | 29.8 | 1                                      | 7.1   | 13                   | 34.2 |
| 1                                                                         | 16       | 19.3 | 11        | 23.4 | 3                                      | 21.4  | 8                    | 21.1 |
| 2                                                                         | 23       | 27.7 | 13        | 27.7 | 7                                      | 50.0  | 6                    | 15.8 |
| 3 or more                                                                 | 20       | 24.1 | 9         | 19.1 | 3                                      | 21.4  | 6                    | 15.8 |
| Prefer not to say/no response                                             | 7        | -    | 5         | -    | -                                      | -     | 5                    | 13.2 |
| Change in household size (stepchildren or other relatives sometimes stay) |          |      |           |      |                                        |       |                      |      |
| Yes                                                                       | 23       | 27.1 | 10        | 20.0 | 4                                      | 28.6  | 6                    | 16.7 |



|                                 |    |      |    |      |    |      |    |      |
|---------------------------------|----|------|----|------|----|------|----|------|
| Financial burden from change    | 16 | 18.8 | 7  | 14.0 | 4  | 28.6 | 3  | 8.3  |
| No financial burden from change | 4  | 4.7  | 3  | 6.0  | 0  | 0.0  | 3  | 8.3  |
| Don't know                      | 1  | 1.2  | 0  | 0.0  | 0  | 0.0  | -  | 0.0  |
| Prefer not to say               | 2  | 2.4  | -  | -    | 0  | 0.0  | -  | 0.0  |
| No                              | 62 | 72.9 | 40 | 80.0 | 10 | 71.4 | 30 | 83.3 |
| Prefer not to say/no response   | 5  | -    | 2  | -    | -  | -    | 2  | -    |
| Housing type                    |    |      |    |      |    |      |    |      |
| Owned/mortgaged                 | 19 | 24.7 | 7  | 16.3 | 3  | 25.0 | 4  | 12.9 |
| Social rented                   | 36 | 46.8 | 20 | 46.5 | 7  | 58.3 | 13 | 41.9 |
| Private rented                  | 16 | 20.8 | 13 | 30.2 | 1  | 8.3  | 12 | 38.7 |
| Other                           | 6  | 7.8  | 3  | 7.0  | 1  | 8.3  | 2  | 6.5  |
| Prefer not to say/no response   | 13 | -    | 9  | -    | 2  | -    | 7  | -    |
| Registered disability           |    |      |    |      |    |      |    |      |
| Yes                             | 20 | 25.3 | 12 | 25.5 | 4  | 30.8 | 8  | 23.5 |
| No                              | 59 | 74.7 | 35 | 74.5 | 9  | 69.2 | 26 | 76.5 |
| Prefer not to say/no response   | 11 | -    | 5  | -    | 1  | -    | 4  | -    |

Figure 1: Responses to the food security module questions in the sample with follow-up (n=52) at baseline and follow-up

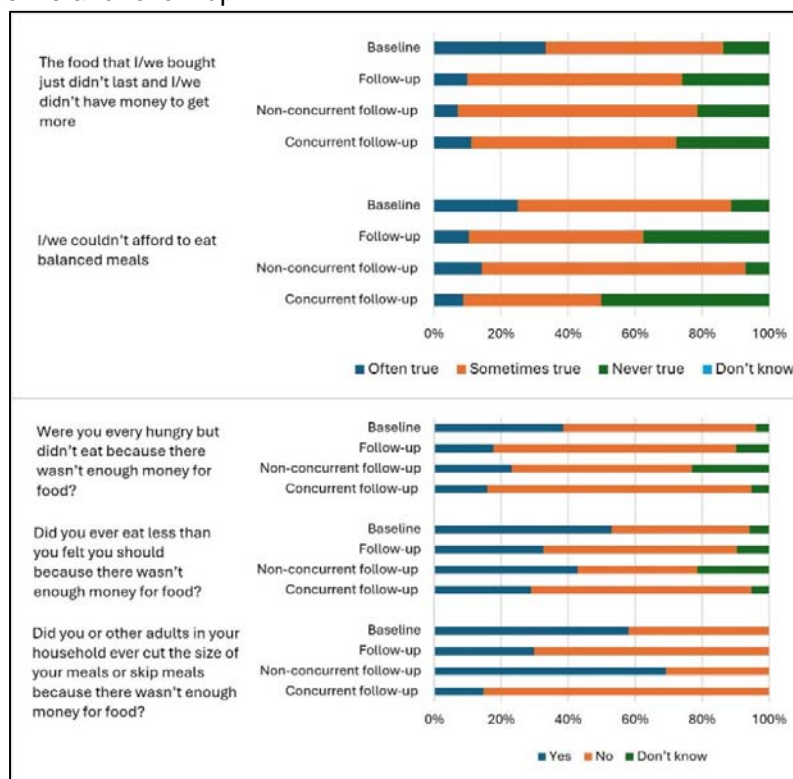

Figure 2: Responses to the short form Warwick-Edinburgh Mental Wellbeing Scale (WEMWBS) questions in the sample with follow-up (n=52) at baseline and follow-up

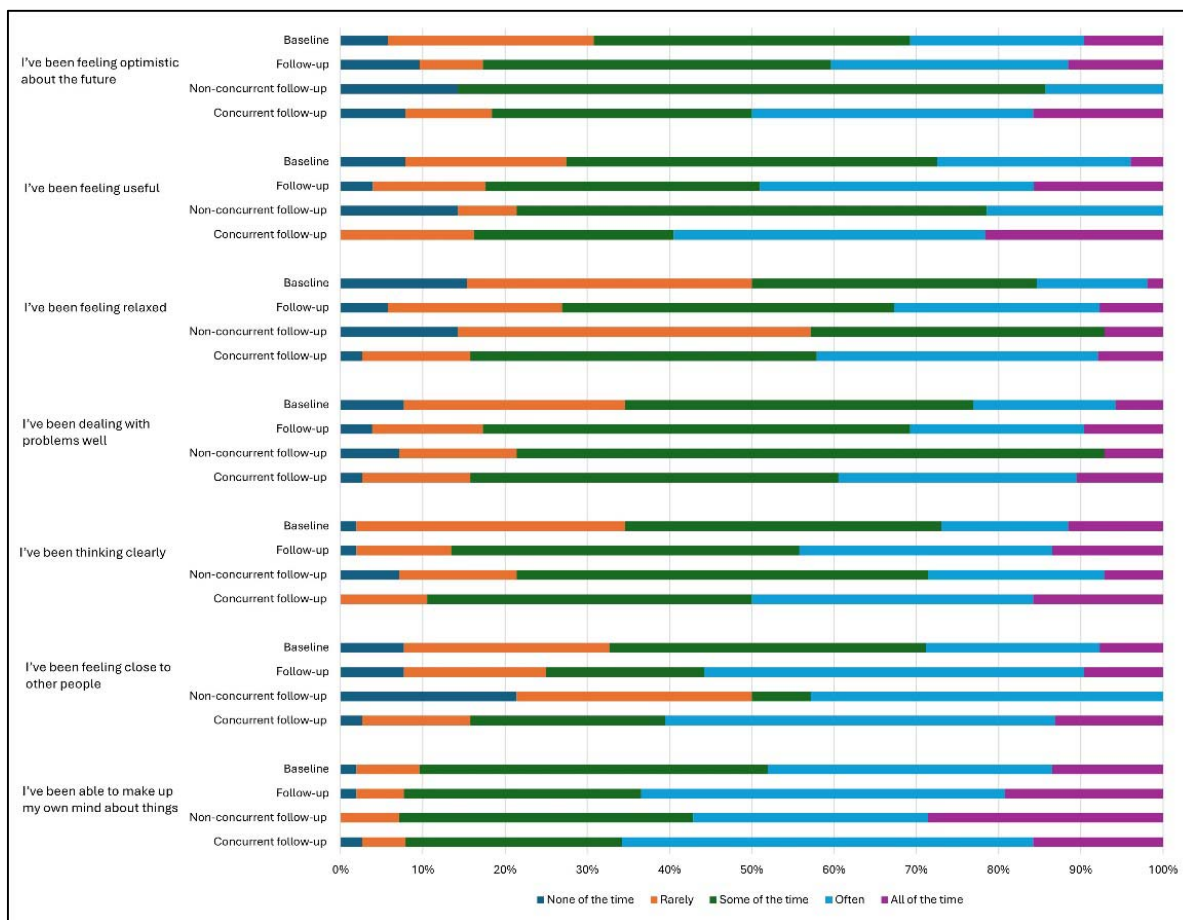

Table 2: Food insecurity, diet quality, mental wellbeing and food practices in the study sample with follow-up data (n=52), overall and by concurrency of follow-up

|                                                               | Baseline |      | Follow-up |      | Non-concurrent follow-up at 3 months (n=14) |      |           |      | Concurrent follow-up (n=38) |      |           |      |
|---------------------------------------------------------------|----------|------|-----------|------|---------------------------------------------|------|-----------|------|-----------------------------|------|-----------|------|
|                                                               | n        | %    | n         | %    | Baseline                                    |      | Follow-up |      | Baseline                    |      | Follow-up |      |
|                                                               |          |      |           |      | n                                           | %    | n         | %    | n                           | %    | n         | %    |
| <b>Food insecurity</b>                                        |          |      |           |      |                                             |      |           |      |                             |      |           |      |
| Food insecurity status                                        |          |      |           |      |                                             |      |           |      |                             |      |           |      |
| High or marginal (food secure)                                | 4        | 10.3 | 16        | 41.0 | 2                                           | 22.2 | 1         | 11.1 | 2                           | 5.3  | 15        | 50.0 |
| Low (food insecure)                                           | 22       | 56.4 | 16        | 41.0 | 5                                           | 55.6 | 5         | 55.6 | 17                          | 44.7 | 11        | 36.7 |
| Very low (food insecure)                                      | 13       | 33.3 | 7         | 17.9 | 2                                           | 22.2 | 3         | 33.3 | 11                          | 28.9 | 4         | 13.3 |
| Unable to categorise                                          | 13       | -    | 13        | -    | 5                                           | -    | 5         | -    | 8                           | -    | 8         | -    |
| Food security status (condensed using Food Foundation method) |          |      |           |      |                                             |      |           |      |                             |      |           |      |
| Food secure                                                   | 14       | 26.9 | 30        | 60.0 | 2                                           | 14.3 | 4         | 30.8 | 12                          | 31.6 | 26        | 70.3 |
| Food insecure                                                 | 38       | 73.1 | 20        | 40.0 | 12                                          | 85.7 | 9         | 69.2 | 26                          | 68.4 | 11        | 29.7 |
| Unable to categorise                                          | -        | -    | 2         | -    | -                                           | -    | 1         | -    | -                           | -    | 1         | -    |
| <b>Diet quality</b>                                           |          |      |           |      |                                             |      |           |      |                             |      |           |      |
| Diet quality score                                            |          |      |           |      |                                             |      |           |      |                             |      |           |      |
| 5-10                                                          | 35       | 67.3 | 27        | 51.9 | 10                                          | 71.4 | 10        | 71.4 | 25                          | 65.8 | 17        | 44.7 |
| 11-15                                                         | 17       | 32.7 | 25        | 48.1 | 4                                           | 28.6 | 4         | 28.6 | 13                          | 34.2 | 21        | 55.3 |
| Change in diet quality score                                  |          |      |           |      |                                             |      |           |      |                             |      |           |      |
| Decreased                                                     | -        | -    | 16        | 30.8 | -                                           | -    | 4         | 28.6 | -                           | -    | 12        | 31.6 |
| No change                                                     | -        | -    | 13        | 25.0 | -                                           | -    | 5         | 35.7 | -                           | -    | 8         | 21.1 |
| Increased                                                     | -        | -    | 23        | 44.2 | -                                           | -    | 5         | 35.7 | -                           | -    | 18        | 47.4 |
| <b>The Warwick-Edinburgh Mental Wellbeing Scale (WEMWBS)</b>  |          |      |           |      |                                             |      |           |      |                             |      |           |      |
| Mental wellbeing                                              |          |      |           |      |                                             |      |           |      |                             |      |           |      |
| High                                                          | 0        | 0.0  | 4         | 7.8  | 0                                           | 0.0  | 0         | 0.0  | 0                           | 0.0  | 4         | 10.8 |
| Average                                                       | 23       | 45.1 | 28        | 54.9 | 6                                           | 42.9 | 6         | 42.9 | 17                          | 45.9 | 22        | 59.5 |
| Low                                                           | 28       | 54.9 | 19        | 37.3 | 8                                           | 57.1 | 8         | 57.1 | 20                          | 54.1 | 11        | 29.7 |
| Unable to categorise                                          | 1        | -    | 1         | -    | -                                           | -    | -         | -    | -                           | -    | 1         | -    |
| Change in mental wellbeing score                              |          |      |           |      |                                             |      |           |      |                             |      |           |      |
| Decreased                                                     | -        | -    | 11        | 21.2 | -                                           | -    | 3         | 21.4 | -                           | -    | 8         | 21.1 |
| No change                                                     | -        | -    | 10        | 19.2 | -                                           | -    | 4         | 28.6 | -                           | -    | 6         | 15.8 |
| Increased                                                     | -        | -    | 31        | 59.6 | -                                           | -    | 7         | 50.0 | -                           | -    | 24        | 63.2 |
| <b>Food practices</b>                                         |          |      |           |      |                                             |      |           |      |                             |      |           |      |
| I feel confident cooking                                      |          |      |           |      |                                             |      |           |      |                             |      |           |      |
| Strongly agree                                                | 17       | 32.7 | 21        | 42.0 | 4                                           | 28.6 | 4         | 28.6 | 13                          | 34.2 | 17        | 47.2 |
| Agree                                                         | 19       | 36.5 | 22        | 44.0 | 7                                           | 50.0 | 8         | 57.1 | 12                          | 31.6 | 14        | 38.9 |
| Neither agree nor disagree                                    | 13       | 25.0 | 6         | 12.0 | 3                                           | 21.4 | 2         | 14.3 | 10                          | 26.3 | 4         | 11.1 |
| Disagree                                                      | 3        | 5.8  | 1         | 2.0  | -                                           | -    | -         | -    | 3                           | 7.9  | 1         | 2.8  |
| Strongly disagree                                             | 0        | 0.0  | 0         | 0.0  | -                                           | -    | -         | -    | -                           | -    | -         | -    |
| No response                                                   | -        | -    | 2         | -    | -                                           | -    | -         | -    | -                           | -    | 2         | -    |
| I cook lunch or the evening meal from scratch                 |          |      |           |      |                                             |      |           |      |                             |      |           |      |
| Daily                                                         | 13       | 25.5 | 18        | 36.0 | -                                           | -    | 1         | 7.1  | 13                          | 35.1 | 17        | 47.2 |
| 2-3 times a week                                              | 19       | 37.3 | 20        | 40.0 | 7                                           | 50.0 | 8         | 57.1 | 12                          | 32.4 | 12        | 33.3 |
| Weekly                                                        | 12       | 23.5 | 7         | 14.0 | 3                                           | 21.4 | 3         | 21.4 | 9                           | 24.3 | 4         | 11.1 |

|                               |    |      |    |      |   |      |   |      |    |      |    |      |
|-------------------------------|----|------|----|------|---|------|---|------|----|------|----|------|
| Monthly                       | 4  | 7.8  | 2  | 4.0  | 3 | 21.4 | 1 | 7.1  | 1  | 2.7  | 1  | 2.8  |
| Less than once a month        | 3  | 5.9  | 3  | 6.0  | 1 | 7.1  | 1 | 7.1  | 2  | 5.4  | 2  | 5.6  |
| No response                   | 1  | -    | 2  | -    | - | -    | - | -    | 1  | -    | 2  | -    |
| I plan meals before shopping  |    |      |    |      |   |      |   |      |    |      |    |      |
| Almost always                 | 17 | 32.7 | 17 | 34.7 | 4 | 28.6 | 3 | 21.4 | 13 | 34.2 | 14 | 40.0 |
| Often                         | 3  | 5.8  | 10 | 20.4 | 2 | 14.3 | 2 | 14.3 | 1  | 2.6  | 8  | 22.9 |
| Sometimes                     | 19 | 36.5 | 10 | 20.4 | 4 | 28.6 | 4 | 28.6 | 15 | 39.5 | 6  | 17.1 |
| Rarely                        | 8  | 15.4 | 9  | 18.4 | 3 | 21.4 | 3 | 21.4 | 5  | 13.2 | 6  | 17.1 |
| Never                         | 5  | 9.6  | 3  | 6.1  | 1 | 7.1  | 2 | 14.3 | 4  | 10.5 | 1  | 2.9  |
| No response                   | -  | -    | 3  | -    | - | -    | - | -    | -  | -    | 3  | -    |
| I/we try new foods or recipes |    |      |    |      |   |      |   |      |    |      |    |      |
| Daily                         | 2  | 4.0  | 4  | 8.2  | - | -    | - | -    | 2  | 5.6  | 4  | 11.1 |
| 2-3 times a week              | 3  | 6.0  | 8  | 16.3 | 2 | 14.3 | 1 | 7.7  | 1  | 2.8  | 7  | 19.4 |
| Weekly                        | 15 | 30.0 | 11 | 22.4 | 4 | 28.6 | 2 | 15.4 | 11 | 30.6 | 9  | 25.0 |
| Monthly                       | 10 | 20.0 | 14 | 28.6 | 2 | 14.3 | 5 | 38.5 | 8  | 22.2 | 9  | 25.0 |
| Less than once a month        | 20 | 40.0 | 12 | 24.5 | 6 | 42.9 | 5 | 38.5 | 14 | 38.9 | 7  | 19.4 |
| No response                   | 2  | -    | 3  | -    | - | -    | 1 | -    | 2  | -    | 2  | -    |

1 *Qualitative data: summary of main themes*

2 Four of the interview participants completed the baseline and follow-up surveys concurrently  
3 whereas the remaining seven were users of newer sites and completed the surveys at  
4 baseline and after three months of using the interventions.

5 In this paper we focus on the most prominent themes from the data about impacts and  
6 experiences of food club. Additional themes included the impact of Covid, strategies for food  
7 access, trying new foods, accessibility and cost and adaptation due to cost of living which  
8 are less relevant for the aim of this paper.

9 **Impact of food club**

10 Participants reported various positive impacts of food club on their diet, finances, health and  
11 social life.

12 ***More varied diet***

13 Fruit and vegetables are available at both food clubs and participants described eating more  
14 fruit and vegetables, some due to having access to these foods and some to partly avoid  
15 food waste. Participants described not wanting to waste food and thus making sure that they  
16 prioritised eating food that they thought was most likely to go off. Participants enjoyed the  
17 variety of fruit and vegetables available at the food club and reported trying to choose  
18 healthy food - *"because you have to get five options of fruit or veg every time, so it once it  
19 comes in the house. I don't like wasting stuff now. So then I feel like I have to eat it so. Yes.  
20 So now I definitely, you know, make a real effort to eat the fruit or veg that comes. So I  
21 would say I have eat, I'm eating more of it now."* – P5

22 One participant described her frustration at previously having to buy biscuits as a snack for  
23 her children as it was the cheapest option available in the supermarket that would last a few  
24 days. She also described trying to ensure that her children have access to fruit (usually  
25 bananas and apples) and vegetables by shopping in budget supermarkets or buying  
26 reduced items but not being able to provide more variety of fruit. She went on to describe her  
27 joy at being able to get fruit from food club that they usually would not be able to buy from  
28 supermarkets more frequently due to the cost. This is in agreement with several participants  
29 who commented on diet improvement after using the food clubs - *"This has been a godsend  
30 [food club] cause it keeps us going, if that makes sense. We don't run out now or cause I or I  
31 believe the children should have. Like I don't have crisps but they should have as much  
32 unlimited fruit snacks as they want ....There's certain foods that we wouldn't normally have  
33 access..."* – P8

34 Some participants also described sometimes making different choices at food club  
35 compared to a supermarket. As food club is structured such that members can select a  
36 certain number of items from item groups, participants described selecting foods that they  
37 would not be willing to spend their money on in a supermarket. These were usually  
38 convenience or snack food such as crisps or sausage rolls which would normally not be part  
39 of their diet. Participants felt it was a balance of getting cheaper healthy food but also  
40 unhealthy food that may not necessarily form part of their diet if they had to pay for it in a  
41 supermarket - *"But they also had a lot of convenient food, like snacks. Hmm. Sausage rolls  
42 or crisps and all that. So some days you have to choose it because it's on the options. So we  
43 also added lots of that type of snacks, which are not healthy. And I will probably not buy if I  
44 was paying with my money in the supermarket, but they were there and they were the  
45 option. So I chose them."* – P11

46 ***Less financial pressure***

47 Food club took the financial strain off buying food to feed the family. Participants with bigger  
48 families reported having to do a shop in a supermarket, mostly in a budget supermarket or  
49 using points and vouchers from loyalty card schemes, partway through the week between  
50 club shops. Participants attending Club B also reported going to a supermarket for essentials  
51 not provided through the club, such as milk and other dairy products, due to the lack of  
52 refrigeration facilities in Club B.

53 Some participants reported being able to buy foods, commonly fresh fruit, in the supermarket  
54 that were generally deemed more expensive. Participants described the balance of getting  
55 food that was acceptable for members of the family at the food club (preferred fruit or at  
56 preferred ripeness/texture) meaning that they could then get the food which others preferred  
57 in the supermarket and feel less guilty or worry less about the cost. Some participants talked  
58 about wanting to eat healthier and lose weight, but the price attached to these choices was a  
59 barrier.

60 Participants also reported not buying certain foods, commonly fresh fruit or meat, as it was  
61 too expensive particularly with the current rates of inflation. They reported going without prior  
62 to going to food club or in between weekly food club visits once they had run out- *“obviously*  
63 *plenty of veg.. fruit and veg.. which I'll get for my girls because they love their fruit and any*  
64 *other time it'll probably won't go and buy it in the shops of how much it is these days. It's so*  
65 *expensive” – P7*

#### 66 ***Improved health, wellbeing and social interaction***

67 Participants at Club A, which is restricted to members resident within a specific geographic  
68 area, reported walking to the food club quite frequently as the eligibility restriction meant that  
69 participants are more likely to live closer to the venue. Local participants at Club B also  
70 reported walking but others who lived further away had to travel by car or public transport to  
71 get to the club. Participants who walked there described it being nice to get out and get  
72 some fresh air.

73 Participants described a sense of relief after going to the food club as it gave them the  
74 opportunity to chat with other members and volunteers in addition to the food access which  
75 alleviated worries around feeding their family - *“I always feel happier after I've been there*  
76 *and I've had a chat and I've, I've sorted out my meals for the week and. Just a bit of relief.” –*  
77 *P6.* Some participants also felt that the interaction with members and volunteers helped  
78 their mental health, and they looked forward to going to the club and having the time to talk  
79 to others.

80 Participants described a warm welcoming atmosphere at the clubs. They found it nice to see  
81 the same people every week which led to new friendships and made them feel more  
82 integrated into the local community. Others also reported that the interactions at the club  
83 may be the only social interaction for them outside of their family that day making it  
84 something they looked forward to. The additional support services available at the club such  
85 as Citizens Advice or housing advice was welcomed as participants also felt they could  
86 easily get support with concerns or issues they were facing – *“There's always something*  
87 *going on that's the extra....So there's kind of like a gateway. So though it's just like a hub,*  
88 *isn't it? You know there are and it's not it's... if you want it if that makes sense it's there for*  
89 *you” – P8.* Members also shared their experiences in managing issues (such as around  
90 housing or bills) with each other and any tips they had learnt as part of their experience.

#### 91 **Experiences of food club**

##### 92 ***Recognising time and food range limitations***

93 Although the experience of food club varied among participants, very few limitations were  
94 reported. The most common limitation was the need to get there early to ensure the trip was  
95 worthwhile so they had plenty of choices available but added to the time it took to get the



96 shopping done. Some participants talked about the need to get there around half an hour to  
97 an hour before the food club opened to ensure they were early in the queue. Queuing  
98 outside before food club opened could be a pleasant experience in good weather but less so  
99 in wet and/or cold weather. This was sometimes a limiting factor for those with other  
100 commitments including education or part-time work and for those with health problems who  
101 could not stand in a queue outside for the necessary time - *“The only sort of downfall is if  
102 you don't get there early, all the good stuff is gone. And I find now I'm going back into work. I  
103 just don't have the time to spend... So yeah, yeah, it's a shame if you're if you've got no other  
104 commitments, then and you can spare two hours, then it's fine.”* – P1.

105 Participants then had to queue inside when food club opened but this was generally  
106 described as a positive experience as participants had the opportunity to get a hot drink (in  
107 some clubs free pastries/biscuits) and socialise with the other members and volunteers.  
108 Participants who could not attend as frequently or who had not socialised as much at the  
109 food club said that it could feel a bit lonely, though generally everyone was friendly.

110 The other limitation that participants reported was around the range and quality of food. Only  
111 Club A provides refrigerated and frozen food so participants attending Club B had to source  
112 these products elsewhere. Most participants reported getting these items from a  
113 supermarket and that they did not mind doing so but others have chosen to visit other food  
114 clubs where these products are provided. As some of the food is sourced from surplus,  
115 participants mentioned having to check packaged fruit and vegetables as these could  
116 sometimes be a bit mouldy or bit wrinkly but was less easy for the staff at food club to  
117 identify due to being packaged.

### 118 **Sense of community**

119 Participants described a sense of community and belonging from attending food club. The  
120 majority of participants lived locally to their club and felt they had made friends and  
121 connections locally that benefitted them in addition to food provision. Participants also  
122 described giving back to the food club through volunteering, donating spare produce that  
123 they had grown at home or in their allotment or through spreading the word about food club  
124 which lead to others donating their spare produce - *“But on the allotment, I do talk to a nice  
125 lady and she's been donating some of her spare produce to the [food club]. So that's been  
126 positive that I've been able to get a lot more people to give produce.”* – P5

### 127 **Overcoming stigma**

128 Some participants reported being reluctant to go to food club or tell some people that they  
129 were going to food club and experiencing internalised stigma, which is when people accept  
130 negative associations to be true and applicable to themselves. The reluctance described  
131 was in communicating to people (other than close friends and family) that they were going to  
132 a food club - *“I think it's not easy knowing you're going to a food club. I usually tell people I'm  
133 going shopping. At the stigma attached? Maybe.”* – P5. Some participants described  
134 overcoming it after a while whereas others mentioned still working on overcoming it or  
135 choosing not to tell people. Some participants described being less worried about money or  
136 having food after attending food club for a while which helped overcome stigma – *“To start  
137 with, you know, I was a bit funny because of the stigma attached to it... But then after a  
138 while, I thought, you know what, I'm not really bothered... I found myself not having to  
139 (worry)... for any type of money to live or anything like that”* – P3.

140 However, participants were very clear that the staff and volunteers and the extended support  
141 community at food club were welcoming and did not make them feel judged or stigmatised.

## 142 **Discussion**

143 There is a sense of a positive impact of food clubs on the food security, diet quality and  
144 mental wellbeing of participants when exploring both survey and interview data. The results  
145 are encouraging and reflect the range of experiences for clients of food clubs or similar aid  
146 schemes. A shift to higher consumption of fruit and vegetables after accessing the clubs  
147 was demonstrated strongly in the interviews. Participants spoke about the relief food aid  
148 offered in terms of cost of food and quality of diet, especially for their children. There was  
149 discussion as well of the stigma around accessing such support, but overall people who  
150 used these clubs spoke positively about the experience.

### 151 ***Food security and diet quality in households***

152 Among participants with follow-up, food security was 27% at baseline, 31% in those with  
153 non-concurrent follow-up and 70% in those with concurrent follow-up using the Food  
154 Foundation approach. Diet quality increased in 35.7% of participants without concurrent  
155 follow-up. This is consistent with a recent systematic review of 21 articles in high-income  
156 countries that noted improvements in diet quality in food bank users (likely due to their  
157 dominance as a form of food aid) (26). However, food parcels often failed to meet nutrient  
158 and individual requirements indicating that the quality of food parcels needed to improve,  
159 with greater provision of meat, fruit and vegetables alongside efforts to provide for cultural  
160 and health needs (26). Another systematic review of nine studies conducted in USA and  
161 Canada focussing on food aid use in households with children also found improvements in  
162 food security and diet quality, with models that provide choice and support services being  
163 most effective (41). Two studies in the USA that delivered a diabetes prevention intervention  
164 to food bank users at risk of diabetes highlighted improvements in food security and fruit and  
165 vegetable consumption (42,43). A longitudinal study in Canada contrasting food banks with a  
166 choice model (similar to the food clubs studied here) also demonstrated greater  
167 improvements to household food security in those using food banks with a choice model  
168 compared to those using food banks without a choice model (12). Our positive findings were  
169 reflected in interviews across the themes of diet variety and financial pressure, with  
170 participants also reporting higher fruit and vegetable consumption in the diet questions.

171 It must be noted that food insecurity is a challenging concept to capture in survey questions.  
172 We chose to ask participants to reflect on the previous 30 days when answering the  
173 questions about food insecurity. We note, however, that some people may experience food  
174 insecurity for brief periods of time due to a sudden change in circumstance (job loss,  
175 relationship breakdown or unexpected costs) or they may experience this over a longer  
176 period of time due to longer term ill health or needing to care for dependents, or an  
177 accumulation of challenging circumstances (25,44). The increased cost of living in the UK  
178 during the study period has meant that the intended aim of food aid to be a temporary  
179 source of support has become a more longer term feature of the food environment. During  
180 the period of data collection, food prices were increasing for many basic items, which will  
181 also impact on household food security as budgets were further stretched (5).

182 The food clubs we worked with in this study intended their use to be temporary, in the case  
183 of Club A they wanted members to move on to purchasing all of their food in retail outlets  
184 after a year. However, this was not feasible in practice. When we returned to share the  
185 results of the research with food club members, we recognised participants from more than a  
186 year prior. Discussion of the research outcomes with the research team highlighted that for  
187 those still using the clubs, they did not have enough money to purchase all of their food from  
188 standard retail options. Some of the differences in outcomes observed between those who  
189 concurrently completed the first two surveys and those who did not may be accounted for  
190 because those who had already been using the food club for longer periods of time were in a  
191 more entrenched time of food insecurity, and there would need to be a more substantial  
192 change to their circumstances to be reflected in food security questions in a survey.

193 Fruit and vegetable provision is a key area for both food clubs included in this study and all  
194 interview participants described household members consuming more fruit and vegetables.  
195 However, the extent of diet changes may not be well captured in the survey results as these  
196 reflect the diet quality of one household member participating in the study. In the interviews  
197 participants told us that they were eating and feeling better since going to food club.  
198 Interview participants with children told us that the fruit tended to be more frequently  
199 consumed by the children after using the food club, as well as vegetables such as carrots  
200 which are frequently consumed raw as a snack.

201 Sometimes there were less familiar vegetables available at food club. Details were given  
202 about how to cook them, or suggested recipes. Participants liked this learning aspect of food  
203 club which meant they tried new foods but could also have the option of providing a more  
204 familiar meal to members of the household who were hesitant to try new foods. Other  
205 participants described being able to buy preferred fruit for a household member when they  
206 went to a supermarket for a usual food shop. Without the food club, they could not afford  
207 these items, which would have meant that household member would not have any fruit in  
208 their diet. As some of the food available at food club have longer shelf lives (such as cereal,  
209 dried pasta, canned beans), participants described the sense of relief knowing that there  
210 was food in the cupboard and thus some meals for the future were in place.

211 Overall, in both the surveys and interviews we can see a promising trajectory for diet quality  
212 among those using the food clubs. In future surveys, researchers need to account for length  
213 of time a participant has been using the clubs and note that surveys are only capturing the  
214 experience of one person through the survey. We know that parents reduce their food intake  
215 to shield children from food insecurity (45), so any intervention may take longer to observe  
216 any positive change for parents. Further, there were a substantial number of cases where  
217 we could not categorise food security status using the standard USDA survey responses as  
218 people skipped the question about how many days they had skipped meals. When we used  
219 the same approach as the Food Foundation, we were able to classify almost all respondents  
220 in terms of food security status.

221 A relatively complex FFQ may not be most effective at identifying diet change as some  
222 practices may not change, such as consumption of fish, due to an overall low food budget  
223 and household diet preferences. Fruit and vegetable consumption is a useful measure, as  
224 this is something participants discussed unprompted, and it is a well-known healthy diet aim.  
225 Food costs remained high and increased significantly during the study period (5), so clubs  
226 may not have as much of a measurable impact as in more affluent times.

### 227 ***Mental wellbeing and community***

228 Wellbeing or mental health are other notable concerns in food-insecure households, and  
229 mental wellbeing increased in 50% of the sample with non-concurrent follow-up and in 63%  
230 with concurrent follow-up. Comments made during the interviews pointed to reduced worry  
231 over food and financial concerns, improved diet options and the engagement with other  
232 clients and volunteers as the reasons for enhanced mental wellbeing. The improvement  
233 observed in our work is in agreement with results from Canada after an 18 month follow-up  
234 (12). The Canadian study was larger and recruited participants accessing different types of  
235 food banks (standard food bank parcel, food bank with choices (similar to food clubs in this  
236 study) and food banks with additional onsite services) with follow-up at 6, 12 and 18 months  
237 and found improvement in mental health at the 18-month follow-up point. A recent study in  
238 the UK explored social impacts of a wide range of aid including food club/pantry, food banks  
239 and community kitchens. Researchers interviewed coordinators and other representatives of  
240 aid and demonstrated the positive impacts of food hubs (including food clubs) for individual  
241 wellbeing of clients, suggesting this was the greatest positive impact they observed (46).

242 Participants who agreed to the interview told us about looking forward to the day they would  
243 go to food club, not only because they could get food (relieving financial stress) but to be  
244 able to interact with other users, staff and volunteers, all of which improved their mental  
245 health. Participants who lived close to the clubs talked about walking to the club when the  
246 weather was good and how this helped their mental and physical health.

247 Participants in our study spoke about the negative aspect of stigma in accessing food aid,  
248 but noted that this also improved as time passed, potentially due to the welcoming  
249 environment at the clubs, interacting with other people in a similar situation and seeing the  
250 same people every week enabling a sense of community. Overall, there were many positive  
251 reflections on the ability to talk with others; building a community for wider social support  
252 were central, as observed in other studies of food clubs (47). This role, as a place to build  
253 community, is echoed in the report on affordable food clubs by Feeding Britain (48).

### 254 ***Strengths and limitations***

255 There are several strengths to this work. The survey tool and interview guide were  
256 developed with several local stakeholders and public input, to ensure the data collected will  
257 inform practice in the food aid settings. The combination of survey data and interviews with  
258 participants allowed us to explore the possible reasons behind patterns noted from the  
259 surveys. There is limited literature on the impacts of food aid in forms other than food banks,  
260 and here we present a mixed-methods study which allowed us to follow-up with participants  
261 as they settle into the intervention. Using validated measures for food security and wellbeing  
262 provide comparability for future studies into the impact of higher-agency food aid.

263 There are some limitations to this study. Some food clubs were established when we  
264 recruited participants, and most participants completed the baseline and follow up surveys  
265 together. Both the USDA food insecurity module and FFQs collect data over the previous 12  
266 months so the time lag is established in the data capture instruments but the risk of  
267 measurement error remains. We have presented results for the overall follow-up as well as  
268 by participants with concurrent follow-up or not for transparency though the sample size by  
269 this categorisation is small. There also is a risk of social desirability bias for both survey and  
270 interview responses. Our sample was predominantly female and of White ethnicity and  
271 therefore the findings may not be generalisable to other groups.

### 272 ***Recommendations for future research and policy***

273 Although FFQs are validated tools, they can be complex to complete for participants. For  
274 example we found some confusion regarding the unit of measurement (which ranged from  
275 portions per day to portions per week). In addition, people may be less familiar with some  
276 food descriptions such as beans or pulses, or differentiating between fibre rich and non-fibre  
277 rich breakfast cereal. Simple data collection tools like describing a portion size of fruit and  
278 vegetables then asking about portion consumption, and the length of surveys should be  
279 considered when designing studies. Similarly, we were unable to categorise food insecurity  
280 for about a quarter of responses using the USDA measure. This was mainly because  
281 participants struggled with the question on how many days they skipped meals. Using the  
282 Food Foundation approach of using three questions out of the six-item USDA measure, we  
283 were able to categorise food insecurity for almost all participants at both time points (two  
284 responses could not be categorised). The Food Foundation approach also aims to capture  
285 more moderate and severe experiences of food insecurity (36).

286 Giving newer club users time to settle-in prior to recruitment to the surveys or interviews  
287 worked well in this study. We attended food clubs regularly during the recruitment period so  
288 users became familiar with us and were used to having us around. We interacted with new  
289 users when they were willing to and mentioned the study but waited until the second or third  
290 visit/week to recruit. This worked well for this study as we found that the new members' first



291 visit to food club was quite overwhelming for most people, and they needed some time to  
292 familiarise themselves. Follow-up can be difficult in this sample as most people did not  
293 respond to phone calls, text messages or emails (49). The stakeholders informed us that  
294 follow-up would be difficult due to difficulties experienced in previous attempts to contact  
295 users. We did not capture data on the food that participants purchased from food club or  
296 compare the differences between foods available at the two clubs and this could potentially  
297 be important work to inform future food provision.

298 In terms of policy, we agree that for optimal flexibility and dignity, cash-first response to food  
299 insecurity is best as noted by others (8). However, as one of our coordinators of food aid  
300 stated, “Food aid is where we are right now.” In this context we aim to improve the process  
301 of collecting insight about the outcomes for people accessing food aid, using simplified  
302 surveys and interviews. To further collect meaningful data, we will further engage with  
303 people who have lived experience of food insecurity to work in and with these communities.

304 Ideally there will be extended state intervention to support food insecure households as the  
305 welfare system has yet to fully meet this need through increasing income via benefit  
306 payments, Healthy Start vouchers or similar. We observed over the time of this study a  
307 decline in the amount of surplus food available to the food clubs, and more food had to be  
308 purchased to meet demand. The reduction in surplus food is positive in terms of less food  
309 potentially going to waste, however, this demonstrates the precarious balance of food aid.  
310 The main policy response to household food insecurity is food aid but the sector relies  
311 predominantly on donations or support from local government (5). There is an irony to see a  
312 sector which has developed to respond to households facing their own precarity in terms of  
313 food supply experiencing similar challenges of sufficient food and staffing, where often  
314 volunteers represent a substantial portion of their workforce (44). There are positive moves  
315 to improve the quality and variety of food available through food aid in any format (5,16).  
316 Access to aid can be improved through more non-referral options, and longer opening hours  
317 clubs including weekends or after usual working hours.

### 318 **Conclusions**

319 This novel exploration of food aid highlights the high prevalence of food insecurity in those  
320 accessing food clubs in Wessex and demonstrates improvements in diet and mental  
321 wellbeing and decreases in food insecurity after accessing food clubs. Food aid is changing  
322 as there is recognition of the need to provide a more sustainable and supportive model to  
323 develop food security. The shift from food banks to higher-agency food aid, such as food  
324 clubs, provides an opportunity to refine the delivery of interventions to optimise outcomes for  
325 the populations they serve, in terms of products available, recipe cards, or wraparound  
326 services available for signposting. Collecting data from clients of these services which allows  
327 comparisons over time through standardised survey modules adds valuable data about the  
328 potential benefits of food clubs/pantries. Understanding more about the experiences of  
329 clients through interviews offers new insights regarding the perceived value and  
330 opportunities for improvement in supporting diet quality and wellbeing. Uniting these  
331 methods provides a process for ongoing data collection and reflection of the relative success  
332 of food clubs until we move to a point where greater equity is achieved, and such aid is no  
333 longer embedded in the food environment.

### 334 **List of abbreviations**

USDA : United States Department of Agriculture  
WEMWBS: Warwick-Edinburgh Mental Wellbeing Scale

### 335 **Declarations:**

336 **Ethics approval and consent to participate**

337 Ethical approval was granted by the University of Southampton Faculty of Environmental  
338 and Life Sciences committee (ERGO 68876). Informed consent was obtained from all study  
339 participants.

#### 340 **Consent for publication**

341 Not applicable.

#### 342 **Availability of data and materials**

343 The anonymised datasets analysed during the current study may be available from the  
344 corresponding authors on reasonable request, pending approval from the relevant ethics  
345 committee and research governance structures.

#### 346 **Competing interests**

347 BM is a trustee of Southampton Social Aid Group. All other authors have no conflicts of  
348 interest to declare.

#### 349 **Funding**

350 This work was supported by the National Institute for Health Research (NIHR) Applied  
351 Research Collaboration (ARC) Wessex. The funder had no role in study design, data  
352 collection and analysis, decision to publish, or preparation of the manuscript. The views  
353 expressed in this paper are those of the authors and not necessarily those of the National  
354 Institute of Health and Care Research or the Department for Health and Social Care. For the  
355 purpose of open access, the author has applied a Creative Commons Attribution (CC BY  
356 4.0) licence to any Author Accepted Manuscript version arising.

#### 357 **Authors' contributions**

358 Authors contributions were as follows: study concept (NAA, DS), study methodology (all  
359 authors), data collection (NZ, ET, NAA, DS), data analysis (NZ, ET), drafting of the  
360 manuscript (NZ, DS), and revising for content (all authors). All authors read and approved  
361 the final manuscript.

#### 362 **Acknowledgements**

363 We would like to thank the study participants, and our PPI representatives for their time and  
364 invaluable contribution to this work. We would like to thank all the staff and volunteers at the  
365 food membership clubs for facilitating study recruitment.

#### 366 **Authors' information**

367 NZ and ET made equal contribution as first author.

#### 368 **References**

- 369 1. Loopstra R. Interventions to address household food insecurity in high-income countries.  
370 Proc Nutr Soc. 2018 Aug;77(3):270–81.
- 371 2. Dixon LB, Winkleby MA, Radimer KL. Dietary Intakes and Serum Nutrients Differ between  
372 Adults from Food-Insufficient and Food-Sufficient Families: Third National Health and  
373 Nutrition Examination Survey, 1988–1994. The Journal of Nutrition. 2001  
374 Apr;131(4):1232–46.
- 375 3. Kirkpatrick SI, Tarasuk V. Food Insecurity Is Associated with Nutrient Inadequacies  
376 among Canadian Adults and Adolescents. The Journal of Nutrition. 2008  
377 Mar;138(3):604–12.
- 378 4. United States Department of Agriculture. U.S. Household Food Security Survey Module  
379 [Internet]. Available from: [https://www.ers.usda.gov/topics/food-nutrition-assistance/food-](https://www.ers.usda.gov/topics/food-nutrition-assistance/food-security-in-the-u-s/survey-tools/#six)  
380 [security-in-the-u-s/survey-tools/#six](https://www.ers.usda.gov/topics/food-nutrition-assistance/food-security-in-the-u-s/survey-tools/#six)



- 381 5. Department for Environment, Food & Rural Affairs. United Kingdom Food Security Report  
382 2024: Theme 4: Food Security at Household Level [Internet]. 2024. Available from:  
383 [https://www.gov.uk/government/statistics/united-kingdom-food-security-report-](https://www.gov.uk/government/statistics/united-kingdom-food-security-report-2024/united-kingdom-food-security-report-2024-theme-4-food-security-at-household-level#introduction)  
384 [2024/united-kingdom-food-security-report-2024-theme-4-food-security-at-household-](https://www.gov.uk/government/statistics/united-kingdom-food-security-report-2024/united-kingdom-food-security-report-2024-theme-4-food-security-at-household-level#introduction)  
385 [level#introduction](https://www.gov.uk/government/statistics/united-kingdom-food-security-report-2024/united-kingdom-food-security-report-2024-theme-4-food-security-at-household-level#introduction)
- 386 6. Taylor N, Boyland E, Hardman CA. Conceptualising food banking in the UK from drivers  
387 of use to impacts on health and wellbeing: A systematic review and directed content  
388 analysis. *Appetite*. 2024 Dec;203:107699.
- 389 7. Dowler E, Lambie-Mumford H. How Can Households Eat in austerity? Challenges for  
390 Social Policy in the UK. *Social Policy & Society*. 2015 Jul;14(3):417–28.
- 391 8. Milbourne P. Beyond ‘feeding the crisis’: Mobilising ‘more than food aid’ approaches to  
392 food poverty in the UK. *Geoforum*. 2024 Mar;150:103976.
- 393 9. Thompson C, Smith D, Cummins S. Understanding the health and wellbeing challenges  
394 of the food banking system: A qualitative study of food bank users, providers and referrers  
395 in London. *Social Science & Medicine*. 2018 Aug;211:95–101.
- 396 10. Douglas F, Sapko J, Kiezebrink K, Kyle J. Resourcefulness, Desperation, Shame,  
397 Gratitude and Powerlessness: Common Themes Emerging from A Study of Food Bank  
398 Use in Northeast Scotland. *AIMS Public Health*. 2015;2(3):297–317.
- 399 11. Garthwaite K. Stigma, shame and ‘people like us’: an ethnographic study of foodbank  
400 use in the UK. *Journal of Poverty and Social Justice*. 2016 Oct;24(3):277–89.
- 401 12. Rizvi A, Wasfi R, Enns A, Kristjansson E. The impact of novel and traditional food bank  
402 approaches on food insecurity: a longitudinal study in Ottawa, Canada. *BMC Public*  
403 *Health*. 2021 Dec;21(1):771.
- 404 13. Jones CL, Ksobiech K, Maclin K. “They Do a Wonderful Job of Surviving”: Supportive  
405 Communication Exchanges Between Volunteers and Users of a Choice Food Pantry.  
406 *Journal of Hunger & Environmental Nutrition*. 2019 Mar 4;14(1–2):204–24.
- 407 14. Martin KS, Wu R, Wolff M, Colantonio AG, Grady J. A Novel Food Pantry Program.  
408 *American Journal of Preventive Medicine*. 2013 Nov;45(5):569–75.
- 409 15. Mukoya MN, McKay FH, Dunn M. Can Giving Clients a Choice in Food Selection Help to  
410 Meet Their Nutritional Needs?: Investigating a Novel Food Bank Approach for Asylum  
411 Seekers. *Int Migration & Integration*. 2017 Nov;18(4):981–91.
- 412 16. Williams A, May J. A genealogy of the food bank: Historicising the rise of food charity in  
413 the UK. *Trans Inst British Geog*. 2022 Sep;47(3):618–34.
- 414 17. Thompson C, Smith D, Cummins S. Food banking and emergency food aid: expanding  
415 the definition of local food environments and systems. *Int J Behav Nutr Phys Act*. 2019  
416 Jan 7;16(1):2.
- 417 18. Pourmotabbed A, Moradi S, Babaei A, Ghavami A, Mohammadi H, Jalili C, et al. Food  
418 insecurity and mental health: a systematic review and meta-analysis. *Public Health Nutr*.  
419 2020 Jul;23(10):1778–90.
- 420 19. Monsivais P, Mclain J, Drewnowski A. The rising disparity in the price of healthful foods:  
421 2004–2008. *Food Policy*. 2010 Dec;35(6):514–20.
- 422 20. Hanson KL, Connor LM. Food insecurity and dietary quality in US adults and children: a  
423 systematic review. *The American Journal of Clinical Nutrition*. 2014 Aug;100(2):684–92.
- 424 21. Shinwell J, Defeyter MA. Food Insecurity: A Constant Factor in the Lives of Low-Income  
425 Families in Scotland and England. *Front Public Health*. 2021 May 19;9:588254.
- 426 22. Armstrong B, Hepworth AD, Black MM. Hunger in the household: Food insecurity and  
427 associations with maternal eating and toddler feeding. *Pediatric Obesity*. 2020  
428 Oct;15(10):e12637.
- 429 23. Crawford PB, Webb KL. Unraveling the Paradox of Concurrent Food Insecurity and  
430 Obesity. *American Journal of Preventive Medicine*. 2011 Feb;40(2):274–5.
- 431 24. Drewnowski A, Specter S. Poverty and obesity: the role of energy density and energy  
432 costs. *The American Journal of Clinical Nutrition*. 2004 Jan;79(1):6–16.
- 433 25. Garthwaite KA, Collins PJ, Bamba C. Food for thought: An ethnographic study of  
434 negotiating ill health and food insecurity in a UK foodbank. *Social Science & Medicine*.  
435 2015 May;132:38–44.

- 436 26. Oldroyd L, Eskandari F, Pratt C, Lake AA. The nutritional quality of food parcels provided  
437 by food banks and the effectiveness of food banks at reducing food insecurity in  
438 developed countries: a mixed-method systematic review. *J Human Nutrition Diet*. 2022  
439 Dec;35(6):1202–29.
- 440 27. Cain KS, Meyer SC, Cummer E, Patel KK, Casacchia NJ, Montez K, et al. Association of  
441 Food Insecurity with Mental Health Outcomes in Parents and Children. *Academic*  
442 *Pediatrics*. 2022 Sep;22(7):1105–14.
- 443 28. Cai J, Parker M, Tekwe C, Bidulescu A. Food insecurity and mental health among US  
444 adults during the COVID-19 pandemic: Results from National Health Interview Survey,  
445 2020–2021. *Journal of Affective Disorders*. 2024 Jul;356:707–14.
- 446 29. Liebe RA, Porter KJ, Adams LM, Hedrick VE, Serrano EL, Cook N, et al. “I’m Doing the  
447 Best that I Can”: Mothers Lived Experience with Food Insecurity, Coping Strategies, and  
448 Mental Health Implications. *Current Developments in Nutrition*. 2024 Apr;8(4):102136.
- 449 30. Lindow P, Yen IH, Xiao M, Leung CW. ‘You run out of hope’: an exploration of low-  
450 income parents’ experiences with food insecurity using Photovoice. *Public Health Nutr*.  
451 2022 Apr;25(4):987–93.
- 452 31. Egele VS, Klopp E, Stark R. Evaluating self-reported retrospective average daily fruit,  
453 vegetable, and egg intake: Trustworthy—Sometimes! *Applied Psych Health & Well*. 2023  
454 Aug;15(3):1130–49.
- 455 32. Rohan TE, Potter JD. RETROSPECTIVE ASSESSMENT OF DIETARY INTAKE.  
456 *American Journal of Epidemiology*. 1984 Dec 1;120(6):876–87.
- 457 33. Schmidt RJ, Goodrich AJ, Granillo L, Huang Y, Krakowiak P, Widaman A, et al.  
458 Reliability of a short diet and vitamin supplement questionnaire for retrospective collection  
459 of maternal nutrient intake. *Global Epidemiology*. 2024 Dec;8:100150.
- 460 34. Raidl M, Johnson S, Gardiner K, Denham M, Spain K, Lanting R, et al. Use  
461 Retrospective Surveys to Obtain Complete Data Sets and Measure Impact in Extension  
462 Programs. *Journal of Extension*. 2004 Apr;42(2):2RIB2.
- 463 35. Tennant R, Hiller L, Fishwick R, Platt S, Joseph S, Weich S, et al. The Warwick-  
464 Edinburgh Mental Well-being Scale (WEMWBS): development and UK validation. *Health*  
465 *Qual Life Outcomes*. 2007 Dec;5(1):63.
- 466 36. The Food Foundation. Food insecurity tracking [Internet]. 2024 [cited 2024 Sep 14].  
467 Available from: <https://foodfoundation.org.uk/initiatives/food-insecurity-tracking>
- 468 37. Cleghorn CL, Harrison RA, Ransley JK, Wilkinson S, Thomas J, Cade JE. Can a dietary  
469 quality score derived from a short-form FFQ assess dietary quality in UK adult population  
470 surveys? *Public Health Nutr*. 2016 Nov;19(16):2915–23.
- 471 38. Stata Statistical Software: Release 17. College Station, TX: StataCorp LLC; 2021.
- 472 39. Braun V, Clarke V. Using thematic analysis in psychology. *Qualitative Research in*  
473 *Psychology*. 2006 Jan;3(2):77–101.
- 474 40. Braun V, Clarke V. Thematic analysis. In: Cooper H, Camic PM, Long DL, Panter AT,  
475 Rindskopf D, Sher KJ, editors. *APA handbook of research methods in psychology, Vol 2:*  
476 *Research designs: Quantitative, qualitative, neuropsychological, and biological* [Internet].  
477 Washington: American Psychological Association; 2012 [cited 2024 Nov 14]. p. 57–71.  
478 Available from: <https://content.apa.org/books/13620-004>
- 479 41. Stahacz C, Alwan NA, Taylor E, Smith D, Ziauddeen N. The impact of food aid  
480 interventions on food insecurity, diet quality and mental health in households with children  
481 in high-income countries: a systematic review. *Public Health Nutr*. 2024;27(1):e195.
- 482 42. Seligman HK, Smith M, Rosenmoss S, Marshall MB, Waxman E. Comprehensive  
483 Diabetes Self-Management Support From Food Banks: A Randomized Controlled Trial.  
484 *Am J Public Health*. 2018 Sep;108(9):1227–34.
- 485 43. Cheyne K, Smith M, Felter EM, Orozco M, Steiner EA, Park Y, et al. Food Bank-Based  
486 Diabetes Prevention Intervention to Address Food Security, Dietary Intake, and Physical  
487 Activity in a Food-Insecure Cohort at High Risk for Diabetes. *Prev Chronic Dis*. 2020 Jan  
488 9;17:E04.

- 489 44. Smith D, Thompson C. Food Deserts and Food Insecurity in the UK: Exploring Social  
490 Inequality [Internet]. 1st ed. London: Routledge; 2022 [cited 2025 Feb 3]. Available from:  
491 <https://www.taylorfrancis.com/books/9781003184560>
- 492 45. Ovenell M, Azevedo Da Silva M, Elgar FJ. Shielding children from food insecurity and its  
493 association with mental health and well-being in Canadian households. *Can J Public*  
494 *Health*. 2022 Apr;113(2):250–9.
- 495 46. Papargyropoulou E, Bridge G, Woodcock S, Strachan E, Rowlands J, Boniface E.  
496 Impact of food hubs on food security and sustainability: Food hubs perspectives from  
497 Leeds, UK. *Food Policy*. 2024 Oct;128:102705.
- 498 47. Moraes C, McEachern MG, Gibbons A, Scullion L. Understanding Lived Experiences of  
499 Food Insecurity through a Paraliminality Lens. *Sociology*. 2021 Dec;55(6):1169–90.
- 500 48. Feeding Britain. Affordable Food Clubs Impact Report (April 2024) [Internet]. Available  
501 from: <https://feedingbritain.org/affordable-food-clubs-impact-report-april-2024/>
- 502 49. Bonevski B, Randell M, Paul C, Chapman K, Twyman L, Bryant J, et al. Reaching the  
503 hard-to-reach: a systematic review of strategies for improving health and medical  
504 research with socially disadvantaged groups. *BMC Med Res Methodol*. 2014  
505 Dec;14(1):42.  
506  
507  
508
